# Supplementary material
Source: publisher figshare collection journal article supplement (https://frontiersin.figshare.com/ndownloader/files/12775574)
Supplement: Supplementary file [file 12775574]

# Differential Analysis of Gut Microbiota Correlated with Oxidative Stress in Sows with High-Low Litter Performance during Lactation

Hao Wang<sup>1, 2</sup>, Jinping Deng<sup>1, 2\*</sup>, Yulong Yin<sup>1, 2, 4\*</sup> and Chengquan Tan<sup>1, 2\*</sup>

## \*Correspondence:

Chengquan Tan  
tanchengquan@scau.edu.cn  
Jinping Deng  
dengjinping@scau.edu.cn  
Yulong Yin  
yinyulong@isa.ac.cn

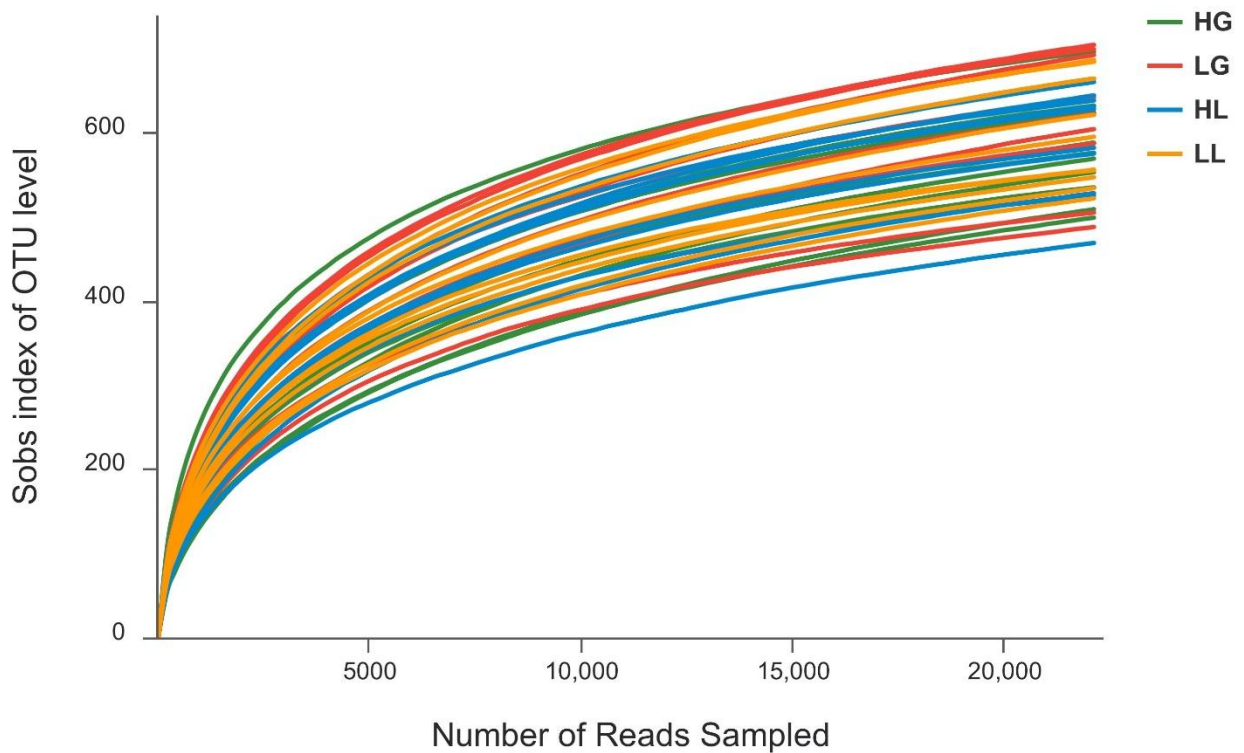

**Figure S1** | Rarefaction analyses of the bacterial diversity of the high and low group on gestation and lactation. Clustering was performed at 97% genetic identity. The results of all analyzed samples of each land use system in a landscape were summarized and averaged.
